# Supplementary material for: Gastric Outlet Obstruction from Stomach-Containing Groin Hernias: A Systematic Review of The Literature
Source: Preprints.org preprint supplement (doi:10.20944/preprints202311.1665.v1), 2023-11-27
Supplement: Supplementary file 1 [file supplementary]

# Supplementary Materials

**Table S1.** Characteristics and clinical presentation for the 92 patients with stomach-containing groin hernias, ordered by chronological occurrence and stratified by inguinal versus femoral hernia.

| n                       | Reference, Year              | Age | Sex    | Laterality | Clinical Presentation                                              |
|-------------------------|------------------------------|-----|--------|------------|--------------------------------------------------------------------|
| <b>Inguinal Hernias</b> |                              |     |        |            |                                                                    |
| 1                       | Lallement, 1802[1]           | 64  | Male   | NR         | Abdominal pain/discomfort and vomiting                             |
| 2                       | Yvan, 1830[2]                | NR  | Male   | NR         | Vomiting                                                           |
| 3                       | Febre, 1832[3]               | 73  | Male   | Right      | No symptoms                                                        |
| 4                       | Fogt, 1884[4]                | 60  | Male   | Left       | Vomiting                                                           |
| 5                       | Schmidt, 1885[5]             | 65  | Male   | Left       | Hematemesis and inguinal pain                                      |
| 6                       | Chiari, 1888[6]              | 74  | Male   | Right      | No symptoms                                                        |
| 7                       | Lewin, 1893[7]               | 53  | Male   | Left       | Emesis and pain                                                    |
| 8                       | Chevereau, 1894[8]           | 77  | Male   | Left       | Emesis and pain                                                    |
| 9                       | Souligoux, 1896[9]           | NR  | Male   | Left       | NR                                                                 |
| 10                      | Brunner, 1897[10]            | 28  | Male   | NR         | NR                                                                 |
| 11                      | Hilgeneriner, 1910[11]       | 52  | Female | Left       | Pain and vomiting                                                  |
| 12                      | Chambard, 1912[12]           | 62  | Male   | Left       | Vomiting, pain, and an incarcerated hernia                         |
| 13                      | Rieder, 1915[13]             | 62  | Male   | Left       | Hematemesis and melena                                             |
| 14                      | Ahrens, 1920[14]             | 40  | Male   | Right      | Pain                                                               |
| 15                      | Maag, 1920[15]               | 81  | Male   | Left       | No symptoms                                                        |
| 16                      | Stokes, 1922[16]             | 42  | Male   | Right      | Vomiting and an incarcerated hernia                                |
| 17                      | Elischer, 1923[17]           | 53  | Male   | Left       | Nausea and an incarcerated hernia                                  |
| 18                      | Elischer, 1923[17]           | 70  | Male   | Left       | Incarcerated hernia                                                |
| 19                      | Dressen, 1925[18]            | 62  | Male   | Left       | Vomiting, pain, and inguinal symptoms when eating                  |
| 20                      | de Vernejoul, 1925[19]       | 57  | Female | Left       | NR                                                                 |
| 21                      | Sicot, 1927[20]              | 59  | Male   | Left       | Pain, vomiting, and dyspepsia                                      |
| 22                      | Lipkin, 1928[21]             | 60  | Male   | Left       | Incarcerated hernia                                                |
| 23                      | Siegmund, 1929[22]           | NR  | Male   | Right      | NR                                                                 |
| 24                      | Novaro, 1930[23]             | 53  | Male   | Right      | Vomiting, pain, and an irreducible hernia                          |
| 25                      | Rodzevich, 1935[24]          | 54  | Male   | Left       | Vomiting and abdominal pain                                        |
| 26                      | Oakley, 1937[25]             | 81  | Male   | Right      | Abdominal and groin pain                                           |
| 27                      | Herrmann, 1937[26]           | 80  | Male   | Left       | Vomiting                                                           |
| 28                      | Lemaitre, 1937[27]           | 51  | Male   | Left       | Dyspepsia                                                          |
| 29                      | Lust, 1937[28]               | 62  | Male   | Left       | NR                                                                 |
| 30                      | Aleksandrovskev, 1940[29]    | 73  | Male   | Left       | Incarcerated hernia                                                |
| 31                      | Feldman, 1943[30]            | 66  | Male   | Right      | No symptoms                                                        |
| 32                      | Hartley, 1945[31]            | 67  | Male   | Left       | Dyspepsia                                                          |
| 33                      | Simmons, 1949[32]            | 66  | Male   | Left       | Nausea, vomiting, and abdominal pain                               |
| 34                      | Lewis, 1950[33]              | 69  | Male   | Right      | Occasional vomiting                                                |
| 35                      | Anger, 1952[34]              | 74  | Male   | Left       | Vague symptoms                                                     |
| 36                      | Bernard, 1953[35]            | NR  | NR     | NR         | NR                                                                 |
| 37                      | Meinterz, 1953[36]           | NR  | NR     | NR         | NR                                                                 |
| 38                      | Davey, 1954[37]              | 61  | Male   | Left       | Vomiting with markedly distended and tense abdomen                 |
| 39                      | Legrand, 1955[38]            | NR  | NR     | NR         | NR                                                                 |
| 40                      | D'Eshougues, 1956[39]        | NR  | NR     | NR         | NR                                                                 |
| 41                      | Allende, 1956[40]            | NR  | NR     | NR         | NR                                                                 |
| 42                      | Kislenskii, 1959[41]         | NR  | NR     | Left       | NR                                                                 |
| 43                      | Hagarty, 1959[42]            | NR  | NR     | NR         | NR                                                                 |
| 44                      | Ship, 1960[43]               | 83  | Male   | Left       | Persistent nausea and vomiting                                     |
| 45                      | Herrera, 1960[44]            | NR  | NR     | NR         | NR                                                                 |
| 46                      | Jackson, 1964[45]            | NR  | NR     | NR         | Strangulation and perforation of the stomach in the inguinal canal |
| 47                      | Falugiani, 1968 <sup>a</sup> | NR  | NR     | NR         | NR                                                                 |
| 48                      | Gue, 1970[46]                | NR  | NR     | NR         | NR                                                                 |

|                        |                           |    |        |           |                                                                                           |
|------------------------|---------------------------|----|--------|-----------|-------------------------------------------------------------------------------------------|
| 49                     | Soudek, 1975[47]          | NR | NR     | NR        | NR                                                                                        |
| 50                     | Padmanabhan, 1976[48]     | 65 | Male   | Left      | NR                                                                                        |
| 51                     | Nagendran, 1977[49]       | NR | NR     | NR        | NR                                                                                        |
| 52                     | Rozencwajg, 1981[50]      | NR | NR     | NR        | NR                                                                                        |
| 53                     | Udwadia, 1984[51]         | NR | NR     | NR        | Hematemesis                                                                               |
| 54                     | Quaranta, 1984[52]        | NR | NR     | NR        | NR                                                                                        |
| 55                     | Resente, 1986[53]         | NR | NR     | NR        | NR                                                                                        |
| 56                     | Naraynsingh, 1987[54]     | 62 | Male   | Left      | Recurrent bouts of vomiting, recurrent GOO                                                |
| 57                     | Levy, 1987[55]            | 49 | Male   | Left      | Abdominal pain, nausea, and weight loss                                                   |
| 58                     | Loizate, 1988[56]         | NR | NR     | NR        | Upper gastrointestinal tract hemorrhage                                                   |
| 59                     | Broquet, 1992[57]         | 64 | Female | Bilateral | Perforation of gastric ulcer within the hernia sac                                        |
| 60                     | Diaz, 1997[58]            | NR | NR     | NR        | NR                                                                                        |
| 61                     | Diaz, 1997[58]            | NR | NR     | NR        | NR                                                                                        |
| 62                     | Walgenbach, 2001[59]      | 72 | Male   | Left      | A 6-hour history of abdominal distension and pain                                         |
| 63                     | Birnbaum, 2011[60]        | 86 | Male   | Right     | Nausea and vomiting                                                                       |
| 64                     | Dogar, 2011[61]           | 65 | Male   | Left      | Irreducible groin bulge, abdominal pain, distention, darkish red vomitus, and obstipation |
| 65                     | Kerschaefer, 2012[62]     | 79 | Male   | Left      | Anorexia, vomiting, and abdominal distension                                              |
| 66                     | Ogul, 2013[63]            | 56 | Male   | Left      | Recurrent vomiting and bilateral incarcerated groin bulges                                |
| 67                     | Ferdinand, 2013[64]       | 73 | Male   | Right     | Iron deficiency anemia and gastric volvulus                                               |
| 68                     | Fazekas, 2014[65]         | 85 | Male   | Left      | Three-day history of gastrointestinal obstructive symptoms                                |
| 69                     | Creedon, 2014[66]         | 87 | Male   | Left      | Colicky abdominal pain for 48 hours and vomiting                                          |
| 70                     | Patel, 2014[67]           | 85 | Male   | Left      | 3-day history of profuse vomiting and abdominal pain                                      |
| 71                     | Lajevardi, 2015[68]       | 83 | Male   | Left      | Four-day history of vomiting and constipation                                             |
| 72                     | Fitz, 2016[69]            | 46 | Male   | Bilateral | Severe abdominal pain after dinner brought in by ambulance to the emergency department    |
| 73                     | Mora-Guzman, 2016[70]     | 79 | Male   | Right     | Abdominal pain and vomiting                                                               |
| 74                     | Perez-Pueyo, 2016[71]     | 61 | Male   | Left      | Gastric necrosis secondary to an incarcerated inguinal hernia                             |
| 75                     | Nugud, 2017[72]           | 67 | Male   | Left      | Bilious vomiting with abdominal pain                                                      |
| 76                     | Sayad, 2019[73]           | 50 | Male   | NR        | Severe abdominal pain                                                                     |
| 77                     | Junge, 2019[74]           | 75 | Male   | Left      | Abdominal pain and nausea                                                                 |
| 78                     | Mehta, 2019[75]           | 75 | Male   | Left      | 5-day history of hematemesis                                                              |
| 79                     | Heylen, 2020[76]          | 74 | Male   | Left      | Dark vomitus and generalized abdominal tenderness                                         |
| 80                     | Patel, 2021 <sup>a</sup>  | 84 | Male   | NR        | Nausea, vomiting, constipation, GOO, and eventual peritonitis                             |
| 81                     | Vinod, 2021[77]           | 49 | Male   | Left      | Acute abdominal pain with nausea and dysuria                                              |
| 82                     | Alexandre, 2022[78]       | 71 | Male   | Left      | Nausea, vomiting, constipation, and GOO                                                   |
| 83                     | Grantham, 2022[79]        | 81 | Male   | Left      | Coffee ground emesis                                                                      |
| 84                     | Abbakar, 2022[80]         | 84 | Male   | Right     | Double GOO. One-day history of severe abdominal pain and dark brown vomiting              |
| 85                     | Huerta, 2023 <sup>a</sup> | 77 | Male   | Left      | Abdominal pain, nausea, vomiting, and GOO                                                 |
| <b>Femoral Hernias</b> |                           |    |        |           |                                                                                           |
| 1                      | Keller, 1885[81]          | 47 | Female | Left      | 3-day history of abdominal pain and vomiting                                              |
| 2                      | Spiegel, 1920[82]         | 55 | Female | Left      | Gastric strangulation                                                                     |
| 3                      | Cave, 1948[83]            | 56 | Female | Left      | Dyspepsia                                                                                 |
| 4                      | Davey, 1954[37]           | 68 | Male   | Left      | No symptoms                                                                               |
| 5                      | Cade, 1984[84]            | 79 | Female | Left      | Abdominal pain, emesis, and hematemesis                                                   |
| 6                      | Natsis, 2008[85]          | 67 | Male   | Left      | Findings at autopsy                                                                       |

GOO, gastric outlet obstruction; NR, not recorded; <sup>a</sup>From posters, abstracts, presentations, and/or present case.

## References reporting of Stomach-Containing Groin Hernias (SCOGH)

Twelve reports appear in the literature between 1802 and 1897.[1-10,81] Most of the cases of SCOGH presented in this manuscript appeared in the literature in the 1900's.[11-58,82-84] Twenty-six reports have been reported in the past 23 years including ours.[59-80,85] References were described as complete as possible. Previous review articles were used for reference material if no other data were available.[37,43] Older manuscripts and/or manuscripts in non-English languages had fewer reference data available.

1. Lallement L. *J Med Chir Pharm* 1802;1:329.
2. Yvan. *Arch gen Med* 1830;22:139.
3. Febre JA. *These de Paris* 1832;132
4. Fogt L. *Arztl Zntelligenzbl* 1884;31:285.
5. Schmidt M. *Berl klin Wschr* 1885;22
6. Chiari H. *Prag med Wschr* 1888;13:115.
7. Lewin TF. *Ann Soc belge Chir* 1893;1
8. Chevereau P. *Bull Soc Anat Paris* 1894;8
9. Souligoux. *Bull Soc Anat Paris* 1896;10
10. Brunner F. Kleinere mittheilungen: Ein fall von hernia ventriculi inguinalis incarcerata. *Zentralbl f Chir* 1897;24:919-21.
11. Hilgenreiner H. Siltene und bemerkenswerte hernien. *Beitr klin Chir* 1910;69:333-430.
12. Chambard ME. La hernie inguinale de l'estomac. *Rev, de gynec e d'obst* 1912;19:61-79.
13. Rieder H. *Fortschr Riintgensrr* 1915;23
14. Ahrens P. *Zbl Chir* 1920;47
15. Maag O. *Dtsh Z Chir* 1920;152
16. Stokes AF. *Med F Aust* 1922;2
17. Elisscher EV. *Ibid* 1923;50:1814.
18. Dressen J. Stomach in inguinal hernia. *Edinb Med J* 1925;32(11):774.
19. de Vernejoul, de Luna D. Sociétés de province: Société de chirurgie de marseille: Volumineuse hernie inguinale renfermant l'estomac et les annexes gauches. *Pr Med* 1925;33:208.
20. Sicot R. Contribu a l'etude des hernies inguinales de l'etomc. *These de Paris* 1927
21. Lipkin L, N. *Odessky med J* 1928;3
22. Siegmund H. *Hand book de Spesillen Paht Anat U Histo* 1929;4
23. Novaro N. *Arch Ital Chir* 1920;27:483.
24. Rodzevich EV. *Vestn Khir Grekov* 1935;41
25. Oakley RH. Strangulation of right inguinal hernia cotaining part of the stomach with simultaneus perforation of a gastric ulcer. *British Journal of Surgery* 1937;25
26. Herrmann J. *Cas Lek ces* 1937;76
27. Lemaitre L. *Bull Soc Radiol Med Paris* 1937;25
28. Lust FJ. Herniation of the stomach into the scrotum. *Am J Roentgenol* 1937;37:666-67.
29. Aleksandrovskiy DG, Degtyarev IG. *Vrac Dyelo* 1940;22
30. Feldman JJM, Titurrioz T. *Sem Med G Aires* 1943;1
31. Hartley JB. Diverticulum of stomach found to enter left inguinal hernial sac. *The British Journal of Radiology* 1945;18(211):231-32.
32. Simmons H. Perforation of stomach in scrotal hernia. *Br Med J* 1949;1(4609):808. doi: 10.1136/bmj.1.4609.808-a
33. Lewis TF, Ross PS. Inguinal herniation of stomach: Case report. *The Ohio State Medical Journal* 1950;46(10):987-88.
34. Anger H. Extreme gastroenteroptose bei beiderseitben scrotalhernien. *Fortschr Roentgenstr* 1952;76
35. Bernard A. Inguino-scrotal hernia of the stomach. *Arch Mal Appar Dig Mal Nutr* 1953;42(12):1400-3.
36. Meinertz O. Inguinal hernia with the stomach functioning as hernial sac content. *Fortschr Geb Rontgenstr* 1953;79(3):400-1.
37. Davey W, Strange S. The stomach as a content of inguinal and femoral herniae. *British Journal of Surgery* 1954;41(170):651-58.
38. Legrand J, Tesson A. Estomac et hernie scrotale: Présentation de clichés. *J radiol et électrol* 1955;36:246.
39. Robert D'Eshougucs J, Miniconi P, Clerget O, Scotto JC. Une ptose gastrointestinale peu banale (hernie inguinale de l'estomac) *Algérie mèd* 1956;60:1043.
40. Allende CI. Hernia escrotal de estómago. *Bol y trab, de la Soc de cir de Buenos Aires* 1956;40:548-51.
41. Kislenskii IF. Left-sided scrotal inguinal hernia, containing the stomach, cecum, ascending & transverse colon. *Khirurgiia (Mosk)* 1959;35(3):99-100.
42. Hagarty G. The stomach in an inguinal hernia. *The Medical journal of Australia* 1959;46:403.
43. Ship AG, Glick AH, Goldenson AB. Incarceration of the stomach in an inguinal hernia: Report of a case. *New England Journal of Medicine* 1960;262(2):78-80.
44. Herrera CA. Large inguinoscrotal hernia containing the stomach. *Prensa Med Argent* 1960;47:2443.
45. Jackson FC, Brown JC, Stiegel DD. Strangulation and perforation of the stomach in an inguinal hernia. *Am Surg* 1964;30:677-81.
46. Gue S. Spontaneous rupture of stomach, a rare complication of inguinal hernia. *Journal of British Surgery* 1970;57(2):154-55.
47. Soudek K, Súra Z. Study of a rare ectopic localization of the stomach in a large scrotal hernial. *Rozhl Chir* 1975;54(5):336-7.
48. Padmanabhan AI, Lowenfels AB. Letter: An unusual hernia. *JAMA* 1976;235(26):2813. doi: 10.1001/jama.235.26.2813c
49. Nagendran T. Stomach contained in a giant scrotal hernia. *The American surgeon* 1977;43(7):473-76.
50. Rozencwajg J. Stomach rupture in inguino-scrotal hernia. *Acta Chir Belg* 1981;80(2-3):159-60.

51. Udwardia T. Stomach strangulated in inguinal hernia presenting with hematemesis. *International surgery* 1984;69(2):177-79.
52. Quaranta M, Rivetti R, Cartia Q. Rare case of inguino-scrotal hernia containing the stomach. *Minerva Chir* 1984;39(23-24):1757-9.
53. Resente F, Corbetti F, Bettini F. Inguinal hernia of the stomach. A case. *Radiol Med* 1986;72(7-8):597-8.
54. Naraynsingh V, Sieunarine K, Raju G. Recurrent gastric outlet obstruction due to an inguinal hernia. *Postgraduate Medical Journal* 1987;63(744):905-06.
55. Levy I, Ebbs SR. Inguinal hernia: An unusual cause of dyspepsia. *Br J Surg* 1987;74(5):363. doi: 10.1002/bjs.1800740512
56. Loizate Totoricaguena A, Lamíquiz Vallejo A. Stomach incarcerated in an inguinal hernia as a cause of upper digestive hemorrhage. *Rev Esp Enferm Apar Dig* 1988;74(2):172-4.
57. Prêtre R, Broquet PE, Robert J, Rohner A. Perforation of gastric ulcer in inguinal hernia. *J Chir (Paris)* 1992;129(4):218-20.
58. Diaz Oller J, Medina Dominguez MT, Arcos Navarro A, Alia Diaz JJ, Asanza Llorente JA, Numancia Andreu MB, Nevado Infante A, Martos Torres J, Moya Vazquez RJ. [stomach in inguinal-scrotal hernia]. *Rev Esp Enferm Dig* 1997;89(4):325-8.
59. Walgenbach KJ, Lauschke H, Brunagel G, Hirner A. [an uncommon form of gastric rupture in giant scrotal hernia]. *Zentralbl Chir* 2001;126(12):1015-7. doi: 10.1055/s-2001-19649 [published Online First: 2002/01/24]
60. Birnbaum DJ, Grègoire E, Campan P, Hardwigsen J, Le Treut YP. A large inguinoscrotal hernia with stomach content. *ANZ journal of surgery* 2011;81(1-2):86-87.
61. Dogar M, Chaudhary A. Inguinal hernia containing stomach, transverse colon and small bowel. *Pakistan J Med Health Sci* 2011;5(3)
62. Kerschaeffer I, Poelmans S, Vankeirsbilck J, Vandewoude M. Rare cause of gastric outlet obstruction: Incarcerated pylorus within an inguinal hernia. *The Annals of The Royal College of Surgeons of England* 2012;94(2):e46-e48.
63. Ogul H, Yuce I, Eren S, Kantarci M. Bilateral inguinal hernia with uncommon content. *Can J Gastroenterol* 2013;27(1):14. doi: 10.1155/2013/873702
64. Ferdinand E, Amir R, Manjunath S. Serendipity of giant proportions. *Clin Gastroenterol Hepatol* 2013;11(10):A25-6. doi: 10.1016/j.cgh.2013.01.009 [published Online First: 20130129]
65. Fazekas B, Frecker P, Francis L, Patel K. Aspiration pneumonia as a complication of a rare type of hernia. *Int J Surg Case Rep* 2014;5(12):1061-3. doi: 10.1016/j.ijscr.2014.10.070 [published Online First: 20141101]
66. Creedon L, Peacock O, Singh R, Awan A. Gastric outlet obstruction secondary to incarcerated pylorus in an inguinal hernia. *The Annals of The Royal College of Surgeons of England* 2014;96(5):e26-e27.
67. Patel K, Francis L, Fazekas B, Panthagani J. Unusual contents of a large incarcerated inguinal hernia. *BMJ Case Rep* 2014;2014 doi: 10.1136/bcr-2014-207886 [published Online First: 20141105]
68. Lajevardi SS, Gundara JS, Collins SA, Samra JS. Acute gastric rupture in a giant inguinoscrotal hernia. *J Gastrointest Surg* 2015;19(12):2283-5. doi: 10.1007/s11605-015-2916-y [published Online First: 20150820]
69. Fitz E, Chihara R, Stanton-Maxey KJ. Gastric perforation associated with bilateral inguinal hernias. *Journal of the American College of Surgeons* 2016;222(2):e12-e13.
70. Mora-Guzman I, Munoz de Nova J, L., di Martino M, Marin-Perez E. Antro gástrico como contenido insólito de una hernia inguinal. *Revista Chilena de cirugía* 2016;68(4):281-82.
71. Pueyo Pérez EM, Andrés Pérez S, García Tejero A, García Fernández C. Gastric necrosis secondary to inguinal incarceration. *Cir Esp* 2016;94(3):180. doi: 10.1016/j.ciresp.2015.10.009 [published Online First: 20151222]
72. Nugud AA, Nugud S. Long-standing asymptomatic inguinoscrotal hernia. *Sultan Qaboos University Medical Journal* 2017;17(2):250-51.
73. Sayad P, Tan AZ. A case report of a gastric perforation in a giant inguinoscrotal hernia: A two-step approach. *International Journal of Surgery Case Reports* 2019;55:174-78.
74. Junge K, Otto J, Oral H. A rare cause of gastric outlet stenosis—scrotal hernia. *Deutsches Ärzteblatt International* 2019;116(29-30):507.
75. Mehta T, Weissman S, Vash A, Yim D, Serrano O. Gastric inguinoscrotal hernia. *ACG Case Rep J* 2019;6(8):e00187. doi: 10.14309/crj.000000000000187 [published Online First: 20190823]
76. Heylen J, Campioni-Norman D. Bilateral inguinoscrotal hernia with gastric contents and subsequent perforation: Lessons in operative management. *International Journal of Surgery Case Reports* 2020;77:853-56.
77. Vinod VC, Younis MU. Gastric strangulation and perforation caused by a giant inguinal-scrotal hernia. *Turk J Emerg Med* 2021;21(3):122-24. doi: 10.4103/2452-2473.309132 [published Online First: 20210212]
78. Alexandre K. A rare case of left inguinoscrotal hernia containing stomach. *Cureus* 2022;14(10)
79. Grantham TA, Ramachandran R, Parvataneni S, Gaduputi V. Stomach within a large inguinal hernia. *Cureus* 2022;14(5):e24783. doi: 10.7759/cureus.24783 [published Online First: 20220506]
80. Abbakar M, Ahmed S, Lim M. Ep-25 double gastric outlet obstruction caused by an incarcerated right inguinal hernia, a rare presentation. *British Journal of Surgery* 2022;109(Supplement\_5) doi: 10.1093/bjs/znac245.006
81. Keller O. Schenkelhernie mit magen als inhalt. *Inag Diss, Bern* 1885
82. Spiegel B. Einklemmung des magens im schenkelbruch. *Zbl Chir* 1920;16:373-74.
83. Cave P. Stomach in a femoral hernia. *The British Journal of Radiology* 1948;21(243):143-45.
84. Cade RJ, Lane RH. Strangulated stomach within a femoral hernia. *Postgraduate Medical Journal* 1984;60(703):376.
85. Natsis K, Apostolidis S, Papadopoulou A, Vlasis K, Totlis T, Skandalakis P. Gastric femoral hernia in a male cadaver with gastroptosis: Case report and review of the literature. *Hernia* 2008;12:205-08.
